# Supplementary material
Source: publisher site journal article supplement (https://www.spandidos-publications.com/5310/downloadSupplementary)

Figure S1. Ecosystem driven by 95GC. Comprehensive gene expression data (CEL file) was obtained from the 95GC assay. The gene expression data together with the clinicopathological information was collected and updated in the registry. This registry would help brush up the existing MGCs and construct a new MGC that could be finally applied in practice. In this way, the 95GC assay was expected to become a trigger for driving the ecosystem. MGCs, multigene classifiers.

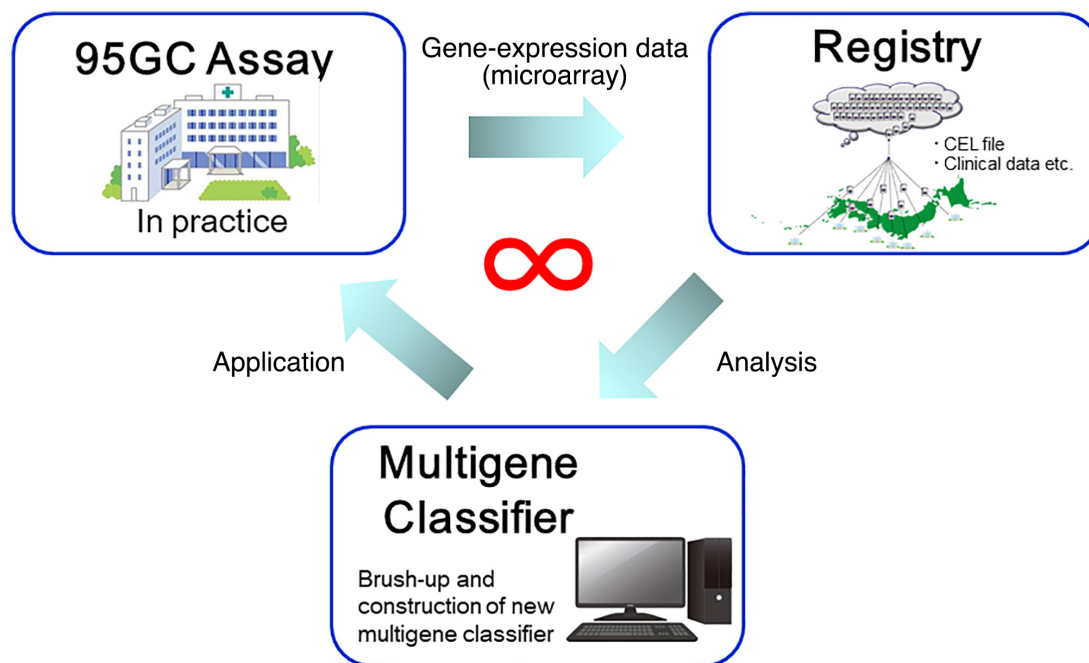

Supplement: Supplementary file 1 [file downloadSupplementary]
